# Supplementary material for: Assessment of DFT approaches in noble gas clathrate-like clusters: stability and thermodynamics
Source: Royal Society of Chemistry journal article supplement (doi:10.1039/d1cp04935f), 2021-12-17
Supplement: d1cp04935f1.pdf [file d1cp04935f1.pdf]

# Assessment of DFT Approaches in Noble Gas Clathrate-like Clusters: Stability and Thermodynamics

Raquel Yanes-Rodríguez<sup>1, a</sup> and Rita Prosmiti<sup>1\*</sup>

<sup>1</sup>*Institute of Fundamental Physics (IFF-CSIC), CSIC, Serrano 123, 28006 Madrid, Spain*

E-mail: \*rita@iff.csic.es; Phone: +34-91-5616800Ext.941131

---

<sup>a</sup>Doctoral Programme in Theoretical Chemistry and Computational Modelling, Doctoral School, Universidad Autónoma de Madrid

## Supplementary material

Table S1: Interaction/cohesive (per water molecule) energies computed at the indicated levels of theory for each He-filled/empty configuration (see Figs. 1 and 2, respectively). Energies are in  $\text{cm}^{-1}$ .

|              | Method/Basis set               | He@5 <sup>12</sup> /5 <sup>12</sup> | He@4 <sup>3</sup> 5 <sup>6</sup> 6 <sup>3</sup> /4 <sup>3</sup> 5 <sup>6</sup> 6 <sup>3</sup> | He@5 <sup>12</sup> 6 <sup>2</sup> /5 <sup>12</sup> 6 <sup>2</sup> | He@5 <sup>12</sup> 6 <sup>4</sup> /5 <sup>12</sup> 6 <sup>4</sup> | He@5 <sup>12</sup> 6 <sup>8</sup> /5 <sup>12</sup> 6 <sup>8</sup> |
|--------------|--------------------------------|-------------------------------------|-----------------------------------------------------------------------------------------------|-------------------------------------------------------------------|-------------------------------------------------------------------|-------------------------------------------------------------------|
| WF-based     | DLPNO-CCSD(T)/AVTZ             | -190.06 <sup>a</sup> /-3226.40      | -188.60/-3064.42                                                                              | -140.55/-3158.19                                                  | -142.48/-3275.81                                                  | -131.57/-3196.33                                                  |
|              | DFMP2/CBS[Q5] <sup>b</sup>     | -169.18 <sup>a</sup> /-3115.75      | -170.22/-2958.71                                                                              | -133.59/-3053.03                                                  | -125.14/-3173.48                                                  | -116.60/-3125.79 <sup>c</sup>                                     |
| DFT-based    | PW86PBE/AVQZ                   | 36.71/-3000.79                      | 34.10/-2833.09                                                                                | 12.16/-2918.82                                                    | 67.01/-3045.35                                                    | 41.24/-2968.75                                                    |
|              | PW86PBE-XDM/AVQZ               | -181.43/-3340.31                    | -180.11/-3173.18                                                                              | -147.54/-3258.41                                                  | -127.47/-3380.76                                                  | -130.27/-3303.30                                                  |
|              | PW86PBE-D4/AVQZ                | -158.17/-3341.72                    | -159.71/-3180.70                                                                              | -131.22/-3263.93                                                  | -112.41/-3386.93                                                  | -115.24/-3312.76                                                  |
|              | revPBE/AVQZ                    | 51.56/-2129.90                      | 46.80/-1932.60                                                                                | -18.53/-2039.52                                                   | 164.26/-2160.98                                                   | 79.38/-2080.46                                                    |
|              | revPBE-D3(0)/AVQZ              | -224.28/-2882.43                    | -227.36/2701.32                                                                               | -204.88/-2790.89                                                  | -161.75/-2911.25                                                  | -164.18/-2825.63                                                  |
|              | revPBE-D3(BJ)/AVQZ             | -251.09/-2836.71                    | -253.35/-2663.15                                                                              | -226.45/-2751.63                                                  | -149.89/-2867.94                                                  | -173.37/-2787.63                                                  |
|              | B3LYP/AVQZ                     | 148.87/-2818.78                     | 142.37/-2648.40                                                                               | 95.92/-2747.60                                                    | 148.55/-3486.72                                                   | 123.25/-2770.95                                                   |
|              | B3LYP-D3(BJ)/AVQZ              | -115.02/-3310.85                    | -118.87/-3152.22                                                                              | -92.13/-3242.41                                                   | -99.58/-3485.00                                                   | -87.45/-3478.12                                                   |
|              | B3LYP-D4/AVQZ                  | -82.25/-3267.38                     | -87.88/-3107.35                                                                               | -70.91/-3201.63                                                   | -71.41/-3322.78                                                   | -65.47/-3049.87                                                   |
|              | PBE0/AVQZ                      | -64.86 <sup>a</sup> /-3092.53       | -67.86/-2939.58                                                                               | -58.23/-3031.41                                                   | -34.19/-3150.02                                                   | -45.52/-3077.99                                                   |
| PBE0-D4/AVQZ | -247.50 <sup>a</sup> /-3369.71 | -249.03/-3220.33                    | -195.72/-3311.75                                                                              | -192.25/-3427.23                                                  | -187.23/-3356.92                                                  |                                                                   |

<sup>a</sup>Interaction energies from ref. 35.

<sup>b</sup>Cohesives energies from ref. 58.

<sup>c</sup>DFMP2/AVQZ / DFMP2/CBS[TQ]

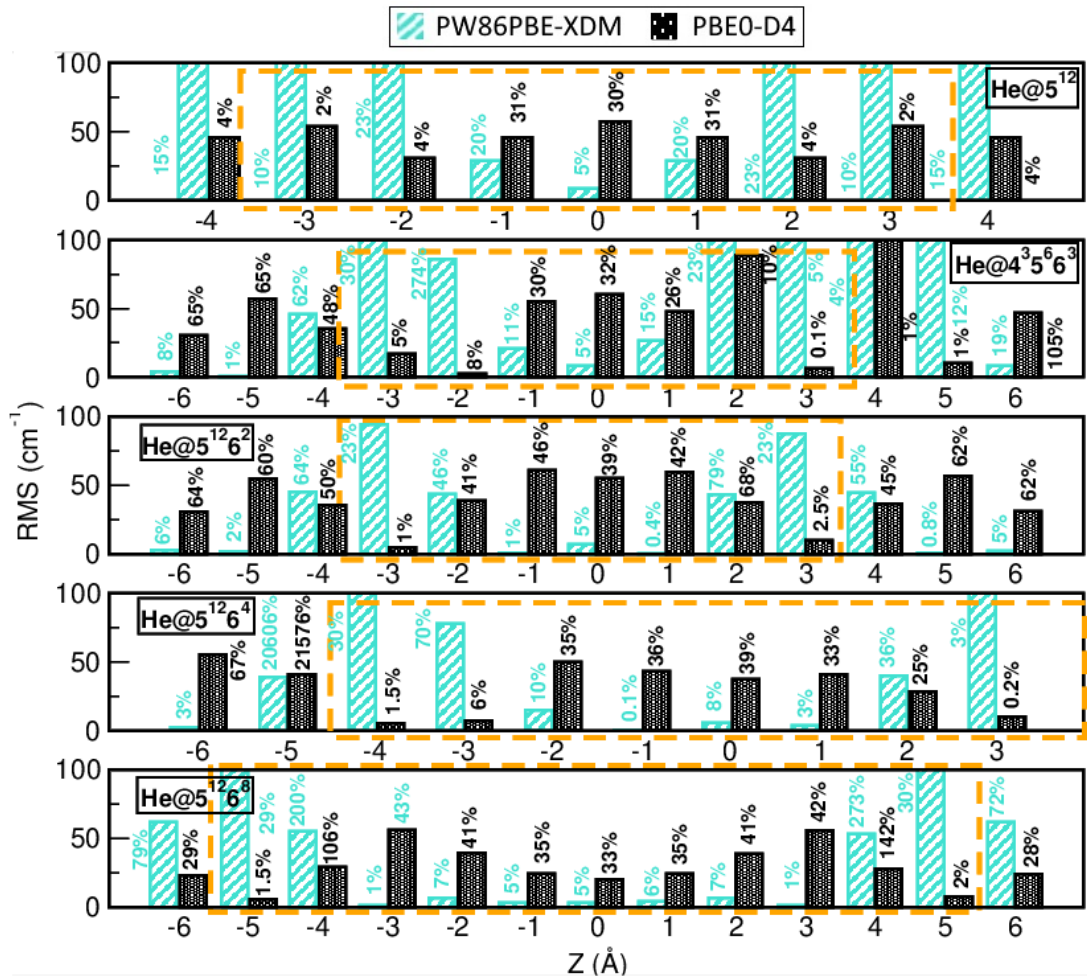

Fig. S1: RMS and % errors of the PBE0-D4 and PW86PBE-XDM energies compared with the DLPNO-CCSD(T)/AVTZ along Z-axis configurations for all He@sl/sII/sH cages studied. Dashed (orange color) boxes indicate configurations inside each cage.
